# Supplementary material for: Deinococcus geothermalis: The Pool of Extreme Radiation Resistance Genes Shrinks
Source: PLOS journal article supplement (doi:10.1371/journal.pone.0000955), 2007-09-26
Supplement: S20 (10.1371/journal.pone.0000955.s020) [file journal.pone.0000955.s020]

**Table S10.** Parsimony pattern rules for reconstruction of evolutionary events in the *Deinococcus*/*Thermus* lineage (gene presence ‘1’or gene absence ‘0’)

| **Exp**A | **Ancestor**B | **DG**C | **DR**D | **TT HB27**E | **TT HB8**F | **Inferences**G |
| --- | --- | --- | --- | --- | --- | --- |
| 0 | 0 | 0 | 0 | 1 | 1 | Gain TT |
| 0 | 0 | 0 | 1 | 0 | 1 | Gain DR, Gain TT8 |
| 0 | 0 | 0 | 1 | 1 | 0 | Gain DR, Gain TT27 |
| 0 | 0 | 0 | 1 | 1 | 1 | Gain DT, Loss DG |
| 0 | 0 | 1 | 0 | 0 | 1 | Gain DG, Gain TT8 |
| 0 | 0 | 1 | 0 | 1 | 0 | Gain DG, Gain TT27 |
| 0 | 0 | 1 | 0 | 1 | 1 | Gain DT, Loss DR |
| 0 | 0 | 1 | 1 | 0 | 0 | Gain DD |
| 0 | 0 | 1 | 1 | 0 | 1 | Gain DT, Loss TT27 |
| 0 | 0 | 1 | 1 | 1 | 0 | Gain DT, Loss TT8 |
| 0 | 0 | 1 | 1 | 1 | 1 | Gain DT |
| 0 | 1 | 0 | 0 | 1 | 1 | Loss DD |
| 0 | 1 | 0 | 1 | 0 | 1 | Loss DG, Loss TT27 |
| 0 | 1 | 0 | 1 | 1 | 0 | Loss DG, Loss TT8 |
| 0 | 1 | 0 | 1 | 1 | 1 | Loss DG |
| 0 | 1 | 1 | 0 | 0 | 1 | Loss DR, Loss TT27 |
| 0 | 1 | 1 | 0 | 1 | 0 | Loss DR, Loss TT8 |
| 0 | 1 | 1 | 0 | 1 | 1 | Loss DR |
| 0 | 1 | 1 | 1 | 0 | 0 | Loss TT |
| 0 | 1 | 1 | 1 | 0 | 1 | Loss TT27 |
| 0 | 1 | 1 | 1 | 1 | 0 | Loss TT8 |
| 0 | 1 | 1 | 1 | 1 | 1 | none |
| 1 | 0 | 0 | 0 | 1 | 1 | Gain TT |
| 1 | 0 | 0 | 1 | 0 | 1 | Gain DR, Gain TT8 |
| 1 | 0 | 0 | 1 | 1 | 0 | Gain DR, Gain TT27 |
| 1 | 0 | 0 | 1 | 1 | 1 | Gain DT, Loss DG |
| 1 | 0 | 1 | 0 | 0 | 1 | Gain DG, Gain TT8 |
| 1 | 0 | 1 | 0 | 1 | 0 | Gain DG, Gain TT27 |
| 1 | 0 | 1 | 0 | 1 | 1 | Gain DT, Loss DR |
| 1 | 0 | 1 | 1 | 0 | 0 | Gain DD |
| 1 | 0 | 1 | 1 | 0 | 1 | Gain DT, Loss TT27 |
| 1 | 0 | 1 | 1 | 1 | 0 | Gain DT, Loss TT8 |
| 1 | 0 | 1 | 1 | 1 | 1 | Gain DT |
| 1 | 1 | 0 | 0 | 1 | 1 | Gain TT |
| 1 | 1 | 0 | 1 | 0 | 1 | Loss DG, Loss TT27 |
| 1 | 1 | 0 | 1 | 1 | 0 | Loss DG, Loss TT8 |
| 1 | 1 | 0 | 1 | 1 | 1 | Loss DG |
| 1 | 1 | 1 | 0 | 0 | 1 | Loss DR, Loss TT27 |
| 1 | 1 | 1 | 0 | 1 | 0 | Loss DR, Loss TT8 |
| 1 | 1 | 1 | 0 | 1 | 1 | Loss DR |
| 1 | 1 | 1 | 1 | 0 | 0 | Gain DD |
| 1 | 1 | 1 | 1 | 0 | 1 | Loss TT27 |
| 1 | 1 | 1 | 1 | 1 | 0 | Loss TT8 |
| 1 | 1 | 1 | 1 | 1 | 1 | none |

A tdCOG is a member of an expanded family.

B Presence/absence in the ancestor of *Cyanobacteria*, *Actinobacteria* and *Deinococcus*-*Thermus* group;

C,D,E,F Presence/absence in *D. geothermalis*, *D. radiodurans*, *T. thermophilus* HB27 and *T. thermophilus* HB8 respectively.

G DT, DD and TT refer to the ancestor of the *Deinococcus*-*Thermus* group, the ancestor of the *Deinococcus* genus, and the ancestor of the *Thermus* genus, respectively.
