# Supplementary material for: Deinococcus geothermalis: The Pool of Extreme Radiation Resistance Genes Shrinks
Source: PLoS One. 2007 Sep 26;2(9):e955. doi: 10.1371/journal.pone.0000955 (PMC1978522; doi:10.1371/journal.pone.0000955)
Supplement: Table S1 — Homology between the D. radiodurans and D. geothermalis megaplasmids. (0.04 MB DOC) [file pone.0000955.s011.doc]

**Table S1.** Homology between the *D. radiodurans* and *D. geothermalis* megaplasmids

|  | **DR chromosome** | **DR412** | **DR177** | **DR plasmid** |
| --- | --- | --- | --- | --- |
| **DG chromosome** | 1731A (1650.5)B | 101A (163.9) B | 21A (38.0)B | 4A (4.6)B |
| **DG574** | 51A (131.5)B | 76A (13.1)B | 20A (3.0)B | 1A (0.4)B |
| C **P(2) = 1.1x10-104** | | | | |

AThe observed number of orthologous proteins encoded in genome partitions of *D. radiodurans* (DR) and *D. geothermalis* (DG). BIn parentheses, the expected number of orthologs under the assumption of independent orthologous relationships with genome location. The significant excess of orthologs encoded in the *D. radiodurans* megaplasmids DR412 and DR177, and in the *D. geothermalis* megaplasmid DG574 indicates homologous relationships between DG574 and the two *D. radiodurans* megaplasmids. C(2) indicates probability of the deviation of the observed values from their expectations according to the 2 statistics.
