# Supplementary material for: Deinococcus geothermalis: The Pool of Extreme Radiation Resistance Genes Shrinks
Source: PLoS One. 2007 Sep 26;2(9):e955. doi: 10.1371/journal.pone.0000955 (PMC1978522; doi:10.1371/journal.pone.0000955)
Supplement: Table S6 — Gene context and motifs of predicted cytoplasmic proteins shared by two Deinococcus species, but for which homologs outside the lineage do not exist. (0.17 MB DOC) [file pone.0000955.s016.doc]

**Table S6.** Gene context and motifs of predicted cytoplasmic* proteins shared by two *Deinococcus* species, but for which homologs

outside the lineage do not exist

| **tdCOG number**A | **Orthologs**A **in DG** | OrthologsA in DR | **Protein Description,**  **(COG number)** | **Comments** |
| --- | --- | --- | --- | --- |
| tdCOG01264 | Dgeo_0029 | DR0017 | Predicted transcriptional regulator, HTH domain of Fis family (COG3877). Other proteins from this family have a Zn-ribbon domain, indicating a possible DNA-binding function | This operon and homologs of Dgeo_0031 (which are Dgeo_1707, DR1557) are implicated in some specific processes related to DNA or RNA repair/replication or modification. Specifically, because Fis-related proteins are known to be involved in such processes in other bacteria [S8], and because of potential co-regulation (divergent operon) with Dgeo_0032, a VacB-type ribonuclease. |
| tdCOG01265 | **Dgeo_0030** | **DR0018** | Uncharacterized protein |
| tdCOG01266 | **Dgeo_0031** | **DR0019** | Uncharacterized protein |
| tdCOG01631 | Dgeo_1706 | DR1556 | Periplasmic sensor signal transduction histidine kinase with GAF domain (COG4585) | Homologs of Dgeo_1707 (Dgeo_0031/DR0019) are associated with RNA nucleases, suggesting some role in RNA (or DNA) modification or repair. This operon may be involved in regulation of these pathways. |
| tdCOG01632 | **Dgeo_1707** | **DR1557** | Uncharacterized protein |
| tdCOG01633 | Dgeo_1708 | DR1558 | Two component transcriptional regulator (REC and HTH domains), LuxR family (COG2197) |
| tdCOG01666 | **Dgeo_0142** | **DR1697** | Uncharacterized protein |  |
| tdCOG01346 | **Dgeo_0209** | **DR0338** | Uncharacterized protein |  |
| tdCOG01376 | **Dgeo_320** | **DR0437** | Uncharacterized protein | Possibly, these genes are co-regulated with a conserved cluster (Dgeo_317-Dgeo_319 and orthologs in *D. radiodurans*) of genes involved in respiratory chain assembly or functioning. |
| tdCOG02716 | **Dgeo_0191** | **DR2230** | Uncharacterized protein | Probably, involved in system dedicated to catabolic/cell cleaning. |
| tdCOG00996 | Dgeo_0192 | DRA0031 | dTDP-glucose pyrophosphorylase related nucleotidyl transferase (COG1209) |
| tdCOG00247 | Dgeo_0193 | DR0654 | Alpha/beta hydrolase family enzyme (COG0596) |
| tdCOG01453 | **Dgeo_0194** | **DR0780** | Uncharacterized protein | Might be co-regulated with the operon above Dgeo_0029 - Dgeo_0031 (divergent operons). |
| tdCOG01261 | **Dgeo_0047** | **DR0003** | Uncharacterized protein, DdrC gene | The mutant is sensitive to radiation and the DR0003 is induced after irradiation [S9]. |
| tdCOG01279 | **Dgeo_0295** | **DR0070** | Uncharacterized protein, DdrB gene | The mutant is sensitive to radiation and DR0070 is induced after irradiation [S9]. |
| tdCOG02722 | **Dgeo_0113** | **DR2378** | Uncharacterized protein | DR2378 is an apparent homolog of DR0331. DR2378 is also a close homolog of Dgeo_0042/DRA0006, which is located in an operon together with a Zn-dependent catabolic enzyme alcohol dehydrogenase (DRA0005). |
| tdCOG01823 | Dgeo_0114 | DR2377 | Membrane-associated cyclase/dehydrase family protein (COG5637) |
| tdCOG01810 | **Dgeo_0383** | **DR2314** | Uncharacterized protein | Possible operon in *D. geothermalis*. |
| tdCOG02715 | **Dgeo_0384** | **DR2229** | Uncharacterized protein |
| tdCOG01273 | **Dgeo_0418** | **DR0047** | Uncharacterized protein | Possibly, involved in RNA metabolism. It might be co-regulated with a Zn-ribbon-containing protein DR0048 and a RNA methyltransferase containing a PUA domain (DR0049). |
| tdCOG01742 | **Dgeo_0440** | **DR2001** | Uncharacterized protein | In *D. geothermalis*, this gene is co-localized with Dgeo_440, a SARP family transcriptional regulator which is involved in the regulation of antibiotic production in *Streptomyces* species [S10]. In *D. radiodurans*, it is probably co-regulated with DR2001, a DinB/YfiT family protein. Thus, the product of this gene might be involved in cell-cleaning or stress response. |
| tdCOG01351 | **Dgeo_0477** | **DR0920** | Uncharacterized protein |  |
| tdCOG02681 | **Dgeo_0462** | **DR0355** | Uncharacterized protein |  |
| tdCOG01314 | **Dgeo_0482** | **DR0212** | Uncharacterized protein | Has a potential metal-binding motif CXXCXXHXH. In both species, this gene is co-localized with a membrane protein of the SanA family, involved in antibiotic resistance [S11]. |
| tdCOG02689 | **Dgeo_0501** | **DR1331** | Uncharacterized protein |  |
| tdCOG02800 | Dgeo_0510 | DRA0366 and  DRA0365 | Uncharacterized protein | Has homologs in other bacteria. In *D. radiodurans*, it is co-localized with membrane biogenesis enzymes (DRA0367, UDP-galactopyranose mutase; and DRA0368, Lipopolysaccharide glycosyltransferase). |
| tdCOG02677 | **Dgeo_0511** | **DR0869** | Uncharacterized protein |
| tdCOG02702 | **Dgeo_0542** | **DR1693** | Uncharacterized protein |  |
| tdCOG00812 | **Dgeo_0879** | **DR2156** | Uncharacterized protein | Dgeo_0879/DR2156 have orthologs in *Thermus*. |
| tdCOG01772 | **Dgeo_0880** | **DR2157** | Uncharacterized protein |
| tdCOG01773 | **Dgeo_0881** | **DR2158** | Uncharacterized protein |
| tdCOG01646 | **Dgeo_0935** | **DR1607** | Uncharacterized protein | Supporting a role in secondary metabolism or cell-cleaning pathways in *D. radiodurans*, the protein is probably co-regulated with DR1608, a DinB/YfiT family protein; and DR1609, a 2-keto-4-pentenoate hydratase-related enzyme. |
| tdCOG02671 | **Dgeo_1022** | **DR0734** | Uncharacterized protein |  |
| tdCOG02234 | Dgeo_1030 | DR1778 | 3-Isopropylmalate dehydratase large subunit (COG0065) | Leucine biosynthesis subunits. |
| tdCOG01689 | **Dgeo_1031** | **DR1781 and**  **DR1780** | Uncharacterized protein |
| tdCOG01690 | Dgeo_1032 | DR1784 | 3-Isopropylmalate dehydratase, small subunit (COG0065) |
| tdCOG00673 | Dgeo_1033 | DR1785 | 3-Isopropylmalate dehydrogenase(COG0473) |
| tdCOG01566 | **Dgeo_1085** | **DR1245** | Uncharacterized protein | Cell wall degradation subunits. |
| tdCOG01465 | Dgeo_1086 | DR0848 | Cell-wall associated protease, NlpD-like (COG0739) |
| tdCOG00471 | Dgeo_1087 | DR1246 | Peptidase M24 (COG0006) |
| tdCOG01628 | **Dgeo_1167** | **DR1539** | Uncharacterized protein | Metal-binding motif HXXXH, probably a metal-dependent hydrolase. |
| tdCOG01605 | **Dgeo_1220** | **DR1416** | Uncharacterized protein |  |
| tdCOG01256 | **Dgeo_1360** | **DRC0030** | Uncharacterized protein |  |
| tdCOG01524 | **Dgeo_1382** | **DR1121** | Uncharacterized protein | Possibly related to energy-conversion processes. |
| tdCOG01523 | Dgeo_1383 | DR1120 | Acetate or butyrate kinase (COG3426) |
| tdCOG01612 | **Dgeo_1393** | **DR1432** | Uncharacterized protein |  |
| tdCOG01728 | **Dgeo_1399** | **DR1896** | Uncharacterized protein |  |
| tdCOG01691 | **Dgeo_1429** | **DR1786** | Uncharacterized protein | In *D. radiodurans*, it is co-localized with alanine dehydrogenase (DR1785), an enzyme for alanine catabolism. Indicating a related function, GntR-like regulators apparently can regulate amino acid catabolism-related processes [S12]. |
| tdCOG01692 | Dgeo_1430 | DR1043 | transcriptional regulator, GntR family (COG1167) |
| tdCOG01693 | **Dgeo_1431** | **DR1788** | Uncharacterized protein |  |
| tdCOG01522 | **Dgeo_1437** | **DR1116** | Uncharacterized protein |  |
| tdCOG01707 | **Dgeo_1465** | **DR1831** | Uncharacterized protein |  |
| tdCOG01706 | **Dgeo_1466** | **DR1830** | Uncharacterized protein |
| tdCOG01647 | **Dgeo_1472** | **DR1615** | Uncharacterized protein |  |
| tdCOG01456 | **Dgeo_1478** | **DR0795** | Uncharacterized protein |  |
| tdCOG01755 | **Dgeo_1527** | **DR2077** | Uncharacterized protein | Possible cell-cleaning/stress response-related system. |
| tdCOG00781 | Dgeo_1528 | DR2076 | Beta-lactamase-like protein (COG0491) |
|  | Dgeo_1529 |  | Calcineurin-like phosphoesterase (COG0622) |
| tdCOG01424 | **Dgeo_1639** | **DR0637** | Uncharacterized protein |  |
| tdCOG01425 | Dgeo_1640 | DR0638 | Uncharacterized protein, putative membrane protein, no homologs |
| tdCOG01711 | **Dgeo_1651** | **DR1840** | Uncharacterized protein |  |
| tdCOG01319 | **Dgeo_1778** | **DR0239** | Uncharacterized protein |  |
| tdCOG02710 | **Dgeo_1783** | **DR2020** | Uncharacterized protein | Contains the metal-binding motif CXXC. |
| tdCOG02796 | **Dgeo_1814** | **DR0877** | Uncharacterized protein | A G-rich protein. |
| tdCOG02678 | **Dgeo_1823** | **DR0887** | Uncharacterized protein |  |
| tdCOG02709 | **Dgeo_1824** | **DR1994** | Uncharacterized protein |  |
| tdCOG02043 | Dgeo_1883 | DR1960 | Acetyl-CoA C-acetyltransferase (COG0183) | Possible membrane biogenesis operon. |
| tdCOG02706 | Dgeo_1884 | DR1961 | Ankyrin repeat protein (COG0666) |
| tdCOG01738 | **Dgeo_1885** | **DR1962** | Uncharacterized protein |
| tdCOG01416 | **Dgeo_1997** | **DR0600** | Uncharacterized protein |  |
| tdCOG01445 | **Dgeo_2024** | **DR0746** | Uncharacterized protein | Possible protease associated component. |
| tdCOG00278 | Dgeo_2025 | DR0745 | peptidase S1/S6, chymotrypsin/Hap (COG0265) |
| tdCOG02714 | **Dgeo_2044** | **DR2207** | Uncharacterized protein |  |
| tdCOG02672 | **Dgeo_2088** | **DR0800** | Uncharacterized protein |  |
| tdCOG01734 | **Dgeo_2113** | **DR1936** | Uncharacterized protein | Proline-rich, internal repeats. |
| tdCOG01344 | **Dgeo_2186** | **DR0326** | Uncharacterized protein, DdrD gene | The mutant is sensitive to IR and DR0326 is induced after irradiation [S9]. |
| tdCOG02717 | **Dgeo_2192** | **DR2237** | Uncharacterized protein |  |
| tdCOG02707 | **Dgeo_2200** | **DR1987** | Uncharacterized protein |  |
| tdCOG00066 | Dgeo_2266 | DR0123 | Phosphoribosylanthranilate isomerase (COG0135) | Possibly, involved in aromatic acid metabolism. |
| tdCOG01295 | **Dgeo_2267** | **DR0124** | Uncharacterized protein |
| tdCOG01925 | **Dgeo_2285** | **DRA0141** | Uncharacterized protein |  |
| tdCOG02249 | Dgeo_2320 | DR0849 | Uncharacterized protein | Possibly, involved in ubiquinone metabolism. |
| tdCOG01466 | **Dgeo_2321** | **DR0850** | Uncharacterized protein |
| tdCOG00319 | Dgeo_2322 | DR0851 | 4-hydroxybenzoate polyprenyltransferase (COG0382) |
| tdCOG02728 | **Dgeo_2325** | **DR2558** | Uncharacterized protein |  |
| tdCOG01960 | Dgeo_2417 | DRA0222 | NAD-dependent epimerase/dehydratase (COG0451) | Probable catechol degradation pathway components. |
| tdCOG01029 | Dgeo_2416 | DRA0220 | 5-Carboxymethyl-2-hydroxymuconate semialdehyde dehydrogenase (COG1012) |
|  | Dgeo_2415 | DR0109 | Lactoylglutathione lyase-related protein (COG0346) |
| tdCOG01959 | **Dgeo_2414** | **DRA0219** | Uncharacterized protein |
| tdCOG01033 | Dgeo_2413 | DRA0226 | 4-Hydroxyphenylacetate degradation bifunctional isomerase/decarboxylase (COG0179) |
| tdCOG01980 | **Dgeo_2628** | **DRA0346** | DNA damage repair protein PprA | The corresponding mutant is sensitive to IR. DRA0346 is induced after irradiation [S9]. *In vitro*, it preferentially bound double-stranded DNA carrying strand breaks, inhibited *E. coli* exonuclease III activity, and stimulated the DNA end-joining reaction catalysed by ATP-dependent and NAD-dependent DNA ligases [S13]. |

*Rare tdCOGs (109) predicted to be secreted or membrane proteins were not considered here, because such proteins have not previously been strongly implicated in radiation or desiccation resistance.

AThe conserved tdCOG and the corresponding protein for the set of interest (see main text) are shown in red and bold typeface, respectively. Other tdCOGs which are in a designated predicted operon are in regular font.

**Supporting References**

[S8] Yuan HS, Finkel SE, Feng JA, Kaczor-Grzeskowiak M, Johnson RC, Dickerson RE, et al (1991) The molecular structure of wild-type and a mutant Fis protein: relationship between mutational changes and recombinational enhancer function or DNA binding. [Proc Natl Acad Sci U S A](javascript:AL_get(this, 'jour', 'Proc Natl Acad Sci U S A.');) 88: 9558-9562.

[S9] Tanaka M, Earl AM, Howell HA, Park MJ, Eisen JA, et al. (2004) Analysis of *Deinococcus radiodurans*'s transcriptional response to ionizing radiation and desiccation reveals novel proteins that contribute to extreme radioresistance. Genetics 168: 21-33.

[S10] Bate N, Stratigopoulos G, Cundliffe E (2002) Differential roles of two SARP-encoding regulatory genes during tylosin biosynthesis. [Mol Microbiol](javascript:AL_get(this, 'jour', 'Mol Microbiol.');) 43: 449-458.

[S11] Rida S, Caillet J, Alix JH (1996) Amplification of a novel gene, *sanA*, abolishes a vancomycin-sensitive defect in *Escherichia coli*. [J Bacteriol](javascript:AL_get(this, 'jour', 'J Bacteriol.');) 178: 94-102.

[S12] Gerischer U (2002) Specific and global regulation of genes associated with the degradation of aromatic compounds in bacteria [J Mol Microbiol Biotechnol](javascript:AL_get(this, 'jour', 'J Mol Microbiol Biotechnol.');) 4: 111-121.

[S13] Narumi I, Satoh K, Cui S, Funayama T, Kitayama S, et al. (2004) PprA: a novel protein from *Deinococcus radiodurans* that stimulates DNA ligation. Mol Microbiol 54: 278-285.
